# Supplementary material for: Loss-of-Function of a Tomato Receptor-Like Kinase Impairs Male Fertility and Induces Parthenocarpic Fruit Set
Source: Front Plant Sci. 2019 Apr 16;10:403. doi: 10.3389/fpls.2019.00403 (PMC6477066; doi:10.3389/fpls.2019.00403)
Supplement: Supplementary file 1 [file Table_1.XLSX]

## Sheet: Table S1
		SUPPLEMENTARY TABLE S1. Pupulations used for genotyping analysis.
			Populations		The number of plants used for genotyping
					WT phenotypes		spff mutant phenotypes
			F2 (spff x Micro-Tom WT)		15		33
			F2 (spff x Ailca Craig WT)		21		31
			BC2F2		21		9
			BC3F2		23		0
			BC3F4		0		10
			Total		80		83
		F2 (spff x Micro-Tom WT); F2 populations derived from a cross between spff mutant and Micro-Tom WT.
		F2 (spff x Ailsa Craig WT); F2 populations derived from a cross between spff mutant and Micro-Tom WT.
		WT phenotypes; F2 plants whose phenotypes resembles to WT.
		spff mutant phenotypes; F2 plants whose phenotypes resembles to spff mutant.

## Sheet: Table S2
	SUPPLEMENTARY TABLE S2. Primer sequences used for this study.
	Primer name	primer sequence	Purpose	Information
	F24	CATTCCCCTGAAACCCCCTC	Genotyping	mutation in Solyc04g076020
	R24	TCTCTCAATTCTGTAAGCTGTCACT	Genotyping	mutation in Solyc04g076020
	F35	AGCTACTAAACAGGCCTTGTAA	Genotyping	mutation in Solyc04g076100
	R35	AACAAGCAAAAATTGGCCCA	Genotyping	mutation in Solyc04g076100
	F37	GCCGCAAGATAGTTCTCCAG	Genotyping	mutation in Solyc04g076250
	R37	GTCACCGTGAATTCCTTGTTGG	Genotyping	mutation in Solyc04g076250
	F38	ACGTTAGGGGAGAAGTAGCT	Genotyping	mutation in Solyc04g076320
	R38	AACTACGTCACTTGACCCCC	Genotyping	mutation in Solyc04g076320
	F18	GCTTTCAGGTTTGCTTCCTT	Genotyping	mutation in Solyc04g077010 (SPFF)
	R18	GGACCGGAAAGTAAGT	Genotyping	mutation in Solyc04g077010 (SPFF)
	F4	TGCCATTCATCAGGGATACA	Genotyping	tomInf4732
	R4	TTGGCACCATCAATCAGAAA	Genotyping	tomInf4732
	F32	GCAGCTTTACCATAACGCGCT	q-RT-PCR, RT-PCR	Solyc04g077010 (SPFF)
	R32	AGGAAGCAAACCTGAAAGCTTGT	q-RT-PCR, RT-PCR	Solyc04g077010 (SPFF)
	SAND_F	TTGCTTGGAGGAACAGACG	q-RT-PCR, RT-PCR	SAND (Solyc03g115810.2.1) (Expósito-Rodríguez et al., 2008)
	SAND_R	GCAAACAGAACCCCTGAATC	q-RT-PCR, RT-PCR	SAND (Solyc03g115810.2.1) (Expósito-Rodríguez et al., 2008)
	CAC_F	CCTCCGTTGTGATGTAACTGG	RT-PCR	CAC (Solyc08g006960.2.1) (Expósito-Rodríguez et al., 2008)
	CAC_R	ATTGGTGGAAAGTAACATCATCG	RT-PCR	CAC (Solyc08g006960.2.1) (Expósito-Rodríguez et al., 2008)
	ishF2	GGCCTATCTTCACCATGATC	Probe for in situ hybridization	Solyc04g077010 (SPFF)
	ishR1	CCCAACACTTACAACAGGC	Probe for in situ hybridization	Solyc04g077010 (SPFF)
	ishT7F2	TGTAATACGACTCACTATAGGGCTGGCCTATCTTCACCATGATC	Probe for in situ hybridization	Solyc04g077010 (SPFF)
	ishR1	CCCAACACTTACAACAGGC	Probe for in situ hybridization	Solyc04g077010 (SPFF)
	ishT7R1	TGTAATACGACTCACTATAGGGCTCCCAACACTTACAACAGGC	Probe for in situ hybridization	Solyc04g077010 (SPFF)
	SlXIPRNAiF1	AAATGATCACCCTTGTGTTGTTTTC	RNAi vector constraction	Solyc04g077010 (SPFF)
	SlXIPRNAiR1	TTCCTCTGGTAATCGCCACG	RNAi vector constraction	Solyc04g077010 (SPFF)
	Purpose; Primers used for shown experiments. Information; Primers that detect shown genes.

## Sheet: Table S3
	SUPPLEMENTARY TABLE S3. List of 77 spff-specific mutations that alter amino acid sequences.
	#CHROM	POS	REF	ALT	type	#sum	#ref	#alt	%alt	gene/adjacent_gene	aa change	type
	MT_SL2.40ch04	58080250	T	G	SNP	27	0	27	100	Solyc04g074490	L456V	missense
	MT_SL2.40ch04	58084176	A	G	SNP	21	0	21	100	Solyc04g074490	K787E	missense
	MT_SL2.40ch04	58113153	AGGGG	AGGG	INDEL	15	0	15	100	Solyc04g074530	E26N | H27I | L28* | I29L | I30L | E31K | E32K | I33L | E34R | V35L | A36L | P37L | P38L | T39L | S40L | W41G | E42K | V43F | R44G | I45L | K46R | I47F | L48F | C49V | T50L | S51P | L52Y | C53V | H54I | S55V | D56M | V57L | T58L | W60G | K61N | L62Y | S63Q | D64T | G65D | P66Q | V67F | S68Q | A69R | F70S | R72E | I73F | L74S | G75V | H76M | E77K | A78Q | A79L | G80V | V81W | V82W | E83R | S84V | …	frameshift/deletion
	MT_SL2.40ch04	58113161	A	C	SNP	16	0	16	100	Solyc04g074530	H27P	missense
	MT_SL2.40ch04	58117406	A	T	SNP	21	0	21	100	Solyc04g074530	I371F	missense
	MT_SL2.40ch04	58121014	C	G	SNP	25	0	25	100	Solyc04g074540	P280A	missense
	MT_SL2.40ch04	58124951	C	T	SNP	25	0	25	100	Solyc04g074550	P40S	missense
	MT_SL2.40ch04	58131831	C	T	SNP	16	0	16	100	Solyc04g074560	E43K	missense
	MT_SL2.40ch04	58147268	G	T	SNP	18	0	18	100	Solyc04g074590	E84D	missense
	MT_SL2.40ch04	58168516	A	G	SNP	12	0	12	100	Solyc04g074650	V40A	missense
	MT_SL2.40ch04	58168588	C	A	SNP	26	0	26	100	Solyc04g074650	C16F	missense
	MT_SL2.40ch04	58168594	T	C	SNP	24	0	24	100	Solyc04g074650	Q14R	missense
	MT_SL2.40ch04	58194020	G	T	SNP	25	0	25	100	Solyc04g074680	L116I	missense
	MT_SL2.40ch04	58194167	G	C	SNP	22	0	22	100	Solyc04g074680	L67V	missense
	MT_SL2.40ch04	58194169	G	A	SNP	22	0	22	100	Solyc04g074680	T66I	missense
	MT_SL2.40ch04	58265744	A	C	SNP	18	0	18	100	Solyc04g074740	F15V	missense
	MT_SL2.40ch04	58273521	T	A	SNP	20	0	20	100	Solyc04g074750	T93S	missense
	MT_SL2.40ch04	58273595	A	T	SNP	17	0	17	100	Solyc04g074750	L68Q	missense
	MT_SL2.40ch04	58275727	C	T	SNP	25	0	25	100	Solyc04g074760	V180I	missense
	MT_SL2.40ch04	58286264	T	C	SNP	14	0	14	100	Solyc04g074770	I90V	missense
	MT_SL2.40ch04	58289674	T	C	SNP	25	0	25	100	Solyc04g074780	I231V	missense
	MT_SL2.40ch04	58293938	G	T	SNP	25	0	25	100	Solyc04g074780	H21N	missense
	MT_SL2.40ch04	58317295	T	C	SNP	18	0	18	100	Solyc04g074810	T243A	missense
	MT_SL2.40ch04	58317298	C	T	SNP	18	0	18	100	Solyc04g074810	A242T	missense
	MT_SL2.40ch04	58337360	C	T	SNP	17	0	17	100	Solyc04g074820	S34L	missense
	MT_SL2.40ch04	58369532	A	C	SNP	10	0	10	100	Solyc04g074850	S15A	missense
	MT_SL2.40ch04	58374454	G	A	SNP	20	0	20	100	Solyc04g074860	P563L	missense
	MT_SL2.40ch04	58402292	T	A	SNP	27	0	27	100	Solyc04g074870	L332M	missense
	MT_SL2.40ch04	58408783	A	C	SNP	12	0	12	100	Solyc04g074890	V294G	missense
	MT_SL2.40ch04	58408987	C	A	SNP	21	0	21	100	Solyc04g074890	C226F	missense
	MT_SL2.40ch04	58420601	C	T	SNP	20	0	20	100	Solyc04g074930	S28F	missense
	MT_SL2.40ch04	58433600	A	G	SNP	11	0	11	100	Solyc04g074950	M210V	missense
	MT_SL2.40ch04	58436617	T	G	SNP	23	0	23	100	Solyc04g074960	M16R	missense
	MT_SL2.40ch04	58436627	A	C	SNP	21	0	21	100	Solyc04g074960	K19N	missense
	MT_SL2.40ch04	58436640	A	G	SNP	21	0	21	100	Solyc04g074960	T24A	missense
	MT_SL2.40ch04	58436686	A	G	SNP	18	0	18	100	Solyc04g074960	N39S	missense
	MT_SL2.40ch04	58436830	A	G	SNP	10	0	10	100	Solyc04g074960	Q87R	missense
	MT_SL2.40ch04	58441488	C	A	SNP	18	0	18	100	Solyc04g074970	S23Y	missense
	MT_SL2.40ch04	58454358	C	T	SNP	23	0	23	100	Solyc04g074980	R431K	missense
	MT_SL2.40ch04	58455583	C	T	SNP	19	0	19	100	Solyc04g074980	S178N	missense
	MT_SL2.40ch04	58455685	C	G	SNP	20	0	20	100	Solyc04g074980	G144A	missense
	MT_SL2.40ch04	58492425	A	T	SNP	15	0	15	100	Solyc04g075000	F239Y	missense
	MT_SL2.40ch04	58492674	A	G	SNP	14	0	14	100	Solyc04g075000	L156S	missense
	MT_SL2.40ch04	58536181	A	G	SNP	18	0	18	100	Solyc04g076010	S111P	missense
	MT_SL2.40ch04	58536782	T	C	SNP	14	0	14	100	Solyc04g076010	R7G	missense
	MT_SL2.40ch04	58552593	G	A	SNP	15	0	15	100	Solyc04g076020	A208V	missense
	MT_SL2.40ch04	58553218	T	A	SNP	20	0	20	100	Solyc04g076020	T181S	missense
	MT_SL2.40ch04	58562240	C	G	SNP	19	0	19	100	Solyc04g076020	S12T	missense
	MT_SL2.40ch04	58657282	G	C	SNP	19	0	19	100	Solyc04g076100	V1185L	missense
	MT_SL2.40ch04	58661882	A	C	SNP	11	0	11	100	Solyc04g076110	D70E	missense
	MT_SL2.40ch04	58661897	T	G	SNP	11	0	11	100	Solyc04g076110	E65D	missense
	MT_SL2.40ch04	58666483	G	C	SNP	24	0	24	100	Solyc04g076120	A26P	missense
	MT_SL2.40ch04	58667402	A	T	SNP	18	0	18	100	Solyc04g076120	Q165L	missense
	MT_SL2.40ch04	58686916	T	C	SNP	26	0	26	100	Solyc04g076140	I443T	missense
	MT_SL2.40ch04	58690138	T	C	SNP	20	0	20	100	Solyc04g076140	M715T	missense
	MT_SL2.40ch04	58694186	A	G	SNP	25	0	25	100	Solyc04g076150	N327D	missense
	MT_SL2.40ch04	58718560	C	G	SNP	14	0	14	100	Solyc04g076180	D1147E	missense
	MT_SL2.40ch04	58719703	T	G	SNP	22	0	22	100	Solyc04g076190	Y208S	missense
	MT_SL2.40ch04	58719892	T	C	SNP	18	0	18	100	Solyc04g076190	D145G	missense
	MT_SL2.40ch04	58728194	T	G	SNP	15	0	15	100	Solyc04g076200	Q21P	missense
	MT_SL2.40ch04	58745244	C	G	SNP	17	0	17	100	Solyc04g076210	N914K	missense
	MT_SL2.40ch04	58745650	C	A	SNP	15	0	15	100	Solyc04g076210	R1050S	missense
	MT_SL2.40ch04	58780788	T	A	SNP	11	0	11	100	Solyc04g076250	E60D	missense
	MT_SL2.40ch04	58788812	T	C	SNP	10	0	10	100	Solyc04g076260	L34S	missense
	MT_SL2.40ch04	58807243	G	A	SNP	13	0	13	100	Solyc04g076290	R393H	missense
	MT_SL2.40ch04	58809045	A	C	SNP	15	0	15	100	Solyc04g076300	L555V	missense
	MT_SL2.40ch04	58815120	G	A	SNP	15	0	15	100	Solyc04g076300	T46M	missense
	MT_SL2.40ch04	58815172	T	C	SNP	16	0	16	100	Solyc04g076300	M29V	missense
	MT_SL2.40ch04	58815174	T	G	SNP	16	0	16	100	Solyc04g076300	K28T	missense
	MT_SL2.40ch04	58835842	C	A	SNP	17	0	17	100	Solyc04g076320	S117I	missense
	MT_SL2.40ch04	58837577	G	C	SNP	17	0	17	100	Solyc04g076330	A27P	missense
	MT_SL2.40ch04	58837865	A	T	SNP	27	0	27	100	Solyc04g076330	M123L	missense
	MT_SL2.40ch04	58838439	TT	TTGGT	INDEL	22	0	22	100	Solyc04g076330	S315G | T317S | I318T | K319I | L320K | F321L | H322F | R323H | M324R | L325M | D326L | Q327D | G328Q | V329G | E330V | F331E | D332F | Y333D | I334Y | T335I | V336T | T338V | V339T | I340V | S341I | A342S | C343A | A344C | R345A | L346R | G347L | A348G | L349A | G350L | T351G | G352T | K353G | W354K | I355W | H356I | E357H | L358E | V359L | K360V | S361K | R362S | G363R | L364G | E365L | W366E |…	frameshift/deletion
	MT_SL2.40ch04	59239947	CT	CTT	INDEL	17	0	17	100	Solyc04g076760	G134W | A135C | G136W | F137I | G138W | S139* | G140W | G141R | A142C | Y143L | A144C | I145Y | T146Y | I147Y | I148Y | D149R | I150Y | I151Y | K152* | V153G | F154L | Y155L | H156S | R157Q | K158E | I159D | S160I | F161L | A163G | G164W | W165L | I166D | L167P | V168C | I169H | T170Y | T171Y | Q172P | V173G | L174S | G175R | Y176L | G177W | W178L | A179G | G180W | I181Y | M182Y | R183E | K184E |…	frameshift/deletion
	MT_SL2.40ch04	59468224	ATGCATCCAATT	AT	INDEL	16	0	16	100	Solyc04g076940	M36I | P38W | I39G | T40A | L41V | G42F | S43R | C44L | F45Q | Q46V | I47N	frameshift/deletion
	MT_SL2.40ch04	59564428	ATC	A	INDEL	27	0	27	100	Solyc04g077010	I411T | P412R | E413V | S414T | L415F | S416F | S417A | L418* | K419I | L421Q | N422L | Y423S | L424* | D425S | L426V | S427* | S428* | N429S | L430F | L431D | I432R | G433K | K434D | I435P | P436* | S438P | L439R | G440* | E441I | L442V | L443T | P444K | N445L | S446Y | M447E | N448L | L449V | S450K | N451Q | N452L | L453T | L454F | S455R | G456S | P457Y | I458T | P459S | L460F | L461V | F462H |…	frameshift/deletion
	MT_SL2.40ch04	60367217	A	AT	INDEL	29	0	29	100	Solyc04g077900	F108L | E111* | N112K | L113S | Q114A | F115V | G116W | G117R | S118K | L119S | G120W | V121S | R122Q | I124N | T125H | I126N | Y127L | A128R | A129S | V130S | I131N | Y132L | V133R | D134* | R135* | F136V | L137S | S138F | L139V | V140S | P141A | R144T | I146N | L147I | R148A | I149D | A150C | V151G | L152V | L153T | A154C | Y155I | A156C | C157M | L158F | Y159I | L160F | A161G | E163* | E164G |…	frameshift/deletion
	CHROM; chromosme number. POS; physical position of mutation on the tomato reference genome (SL2.40). REF; (Micro-Tom); Sequence of WT tomato Micro-Tom genome based on SL2.40. ALT; Sequence of spff mutant genome. mutation type; Type of mutation. #sum; The number of total sequence reads used in variant calling. #ref The number of sequence reads same as REF. #alt; The number of sequence reads same a…

## Sheet: Table S4
	SUPPLEMENTARY TABLE S4. List of 46 candidate genes responsible for spff mutant narrowed by NGS analysis.
	Candidate gene	short_description (TAIR10)
	Solyc04g074490	transferases. transferring glycosyl groups
	Solyc04g074530	GroES-like zinc-binding dehydrogenase family protein
	Solyc04g074540	GroES-like zinc-binding dehydrogenase family protein
	Solyc04g074550	cytochrome C oxidase 6B
	Solyc04g074560	member of SYP12 Gene Family
	Solyc04g074590	Seryl-tRNA synthetase
	Solyc04g074650	vacuoleless1 (VCL1)
	Solyc04g074680	unknown protein
	Solyc04g074740	Cupredoxin superfamily protein
	Solyc04g074750	RNA-binding (RRM/RBD/RNP motifs) family protein
	Solyc04g074760	unknown protein
	Solyc04g074770	unknown protein
	Solyc04g074780	unknown protein
	Solyc04g074810	basic helix-loop-helix (bHLH) DNA-binding superfamily protein
	Solyc04g074820	RING/U-box superfamily protein
	Solyc04g074850	MATE efflux family protein
	Solyc04g074860	MATE efflux family protein
	Solyc04g074870	purine permease 1
	Solyc04g074890	Ubiquitin-like superfamily protein
	Solyc04g074930	unknown protein
	Solyc04g074950	unknown protein
	Solyc04g074960	unknown protein
	Solyc04g074970	Phototropic-responsive NPH3 family protein
	Solyc04g074980	auxin F-box protein 5
	Solyc04g075000	Protein kinase superfamily protein
	Solyc04g076010	unknown protein
	Solyc04g076020	transducin family protein / WD-40 repeat family protein
	Solyc04g076100	unknown protein
	Solyc04g076110	unknown protein
	Solyc04g076120	serine carboxypeptidase-like 18
	Solyc04g076140	Rho GTPase activation protein (RhoGAP) with PH domain
	Solyc04g076150	unknown protein
	Solyc04g076180	cell division cycle protein 48-related / CDC48-related
	Solyc04g076190	Eukaryotic aspartyl protease family protein
	Solyc04g076200	Adenine nucleotide alpha hydrolases-like superfamily protein
	Solyc04g076210	ubiquitin-specific protease 16
	Solyc04g076250	glutamate-ammonia ligases;catalytics;glutamate-ammonia ligases
	Solyc04g076260	unknown protein
	Solyc04g076290	O-fucosyltransferase family protein
	Solyc04g076300	MSCS-like 3
	Solyc04g076320	L-Aspartase-like family protein
	Solyc04g076330	Tetratricopeptide repeat (TPR)-like superfamily protein
	Solyc04g076760	oligopeptide transporter 4
	Solyc04g076940	unknown protein
	Solyc04g077010	Leucine-rich repeat transmembrane protein kinase family protein (XYLEM INTERMIXED WITH PHLOEM 1)
	Solyc04g077900	cyclin d4;2
	Candidate gene; The predicted gene annotation on which mutation is located. short_description (TAIR10); Homologous gene name to the candidate genes. The alphabet adjecent to canidate genes

## Sheet: Table S5
	SUPPLEMENTARY TABLE S5. Linking analysis of the candidate mutations associated with parthenocarpy in spff mutant.
	Candidate gene		POS		The number of plants showing each genotype
					F2 plants with parthenoapy				F2 plants without parthenocarpy
					m/m		+/m, +/+		m/m		+/m, +/+
	Solyc04g076020		58548114		16/16		0/16		9/29		20/29
	Solyc04g076100		58654936		74/78		4/78		3/5		2/5
	Solyc04g076250		58780765		9/44		35/44		0/7		7/7
	Solyc04g076320		58832538		73/79		6/79		3/9		6/9
	Solyc04g077010		59564428		83/83		0/83		0/80		80/80
	Candate gene. Candidate gene name in which mutations were found and chosen for the linkage analysis. POS; physical position of mutation on the tomato reference genome (SL2.40). m/m; The number of plants exibiting homozygous mutant genotype to the total number of plants used for genotyping. +/m, +/+; The number of plants exibiting heterozygouf and WT mutant genotype to the total number of plants u…

## Sheet: Table S6
	SUPPLEMENTARY TABLE S6. List of differentially expressed genes in the ovary transcriptome between WT and the spff mutant.
			RPKM [WT]			RPKM [spff]
		Gene	Average	SE		Average	SE	Log2FC [spff/WT]	q-value	Annotation
	Up-regulated
		Solyc08g080230.1	0	0		11.2634	0.879551	Inf	0.0468503	Unknown Protein
		Solyc02g071100.2	0.256948	0.0556712		2.80205	0.130317	3.44693	0.025646	Purine permease family protein
		Solyc04g064770.1	0.472932	0.251601		5.11015	0.202724	3.43366	0.0382305	Zinc finger transcription factor 34
		Solyc03g006880.2	0.269347	0.0654428		2.88807	0.0709738	3.42257	0.0093405	SlGA20ox1
		Solyc01g106750.1	0.392212	0.0439521		1.7594	0.0410337	2.16538	0.0135426	Unknown Protein
		Solyc11g066600.1	2.03911	0.170011		6.53878	0.204581	1.68108	0.030746	Serine carboxypeptidase S28 family protein
		Solyc01g107490.1	1.28233	0.112286		3.81334	0.13244	1.57229	0.0382305	BHLH transcription factor family
		Solyc01g090460.2	3.52043	0.19908		10.0346	0.137302	1.51116	0.0093405	HD-ZIP family
		Solyc06g073750.2	0.808632	0.0538423		2.19739	0.0757422	1.44223	0.0382305	Beta-D-glucosidase
		Solyc04g080720.2	7.5247	0.280816		16.9347	0.299969	1.17028	0.0135426	Transferase family protein
		Solyc04g074740.2	6.57326	0.116562		14.2553	0.150365	1.11682	0.00274743	Blue copper-like protein
		Solyc06g083080.2	37.0311	1.64971		78.577	2.81315	1.08537	0.0468503	Unknown Protein
		Solyc05g014710.2	11.4247	0.66305		24.0638	0.367961	1.07471	0.0309257	Remorin family protein
	Down-regulated
		Solyc02g078150.2	25.1857	0.802928		2.09103	0.34137	-3.59032	0.0093405	Plant-specific domain TIGR01615 family protein
		Solyc02g092550.2	8.65052	0.241441		0.928525	0.295755	-3.21977	0.0175152	LOB domain protein
		Solyc03g120990.2	13.5152	0.66406		1.88887	0.38507	-2.83899	0.0376229	Malic enzyme
		Solyc00g049520.2	8.98419	0.106827		1.38738	0.206365	-2.69503	0.00552925	Unknown Protein
		Solyc01g107190.2	28.8156	0.898157		5.61932	0.449591	-2.35838	0.0135426	LOB domain protein
		Solyc12g094620.1	312.363	15.2677		69.6629	5.89399	-2.16476	0.0382305	catalase
		Solyc11g008440.1	100.684	5.22626		28.9082	1.29888	-1.80028	0.0454808	Amino acid transporter
		Solyc02g086700.2	1.41509	0.0489098		0.432147	0.0464363	-1.7113	0.0382305	Beta-1 3-glucanase
		Solyc05g005150.1	30.428	0.507176		10.293	1.47096	-1.56374	0.0468503	F-box/Kelch repeat-containing F-box family protein
		Solyc00g009090.2	2.6011	0.0563284		0.981684	0.0548555	-1.40579	0.0168226	Receptor like kinase, RLK
		Solyc10g076200.1	456.878	11.8068		181.024	12.9421	-1.33563	0.0347678	Non-specific lipid-transfer protein
		Solyc02g090400.2	4.71622	0.15698		1.96849	0.10654	-1.26055	0.0382305	Myb family transcription factor
	Up-regulated, List of DEGs that were up-regulated in spff mutant compared to WT. down-regulated, List of DEGs that were down-regulated in spff mutant compared to WT.Average, Average of RPKM value of three biological repetitions. SE, Standard error of RPKM value of three biological repetitions. Log2FC[spff/WT], Log2 fold change of RPKM in spff mutant versus WT. q-value, q-value for false discovery…
